# Supplementary material
Source: publisher figshare collection journal article supplement (https://frontiersin.figshare.com/ndownloader/files/26513615)
Supplement: Supplementary file 1 [file 26513615]

**Table of Contents**

1. Supplementary Methods
2. Supplementary Figures S1 to S12
3. Supplementary Tables S1 and S2
4. Extended discussion on scaling Fe quotas
5. Supplementary References

**Supplementary Methods:**

***Dissolved iron calculations:*** In the Fe-EDTA buffered medium used in this experiment, light and temperature can affect the availability of free, dissolved iron (Fe′) in the media (Sunda and Huntsman, 2003). We calculated the average concentration of Fe′ ([Fe′]) for our experimental conditions following Jabre and Bertrand (2020) and using data from Sunda and Huntsman (1995) to calculate dissociation constants for light and dark conditions relevant to our experimental temperatures that enabled active *Crocosphaera* growth: 22ºC, 27ºC, and 32ºC. We then applied these temperature-specific dissociation constants to calculate average [Fe′] (Table S1) using the following equation (Sunda and Huntsman, 2003):

Such that:

**[FeEDTA*]:** Total Fe concentrations added to the media: 2.5 x 10-7 M (250 nM) for replete and 5.00 x 10-9 M (5 nM) for Fe-limited media.

**K′d:** The Fe-EDTA dissociation constant in the dark determined for each experimental temperature via a linear regression where T = temperature (Figure S1):

**Ihv:** Ratio of the experimental light conditions relative to conditions used to measure Khv in Sunda and Huntsman, 2003 (150 µmol m-2 s-1 / 500 µmol m-2 s-1 = 0.3)

**Khv:** The Fe-EDTA dissociation constant in the light determined for each experimental temperature via a linear regression where T = temperature (Figure S1):

**h:** The number of light hours used in the experiment = 12.

**[EDTA*]:** The free EDTA concentration was calculated by subtracting the total concentration of trace metals in the trace metals stock (Mn + Zn + Co + Mo = 3.51 x 10-7) and the experimental Fe concentration ([FeEDTA*]) from the total EDTA concentration (2.5 x 10-5 M).

***Sensitivity analyses***: The maximum and minimum observed values in our experimental data for N-IUE and N2-fixation rates were used to parameterize a “high sensitivity” and “low sensitivity” analyses, respectively, to assess the uncertainty in the modeled outputs. These results were then compared to our “best” estimate outputs based on the mean experimental values (Figure S7-S8). While these upper and lower bound estimates changed the magnitude of the N-IUE and N2-fixation response to iron and temperature, the general trends and conclusions remain unchanged (Figure S7, Figure S8).

***Spatial overlap analysis:*** Different thresholds were used to establish a baseline of comparison for the modeled responses of *Crocosphaera* and *Trichodesmium* N-IUE and N2-fixation in 2100 relative to 2010. Colored areas indicate where the percent change in physiology is predicted to increase above the 25%, 50%, 75%, and 90% quantiles to assess areas where diazotroph activity was most affected by warming to infer biogeographical implications (Figure S11-S12). Increasing quantiles reflected an increase in the percent change of both diazotrophs, and the areas exhibiting percent change above the 75% quantile suggesting potential biogeographic specialization in warming oceans with minimal functional overlap between the two diazotrophs (Figure S11C, Figure S12C). Areas of the greatest change (90%) further reinforce this trend (Figure S11D, Figure S12D).

**Supplementary Figures:**

**Figure S1.** Log of Fe-EDTA dissociation constants (Kd) as a function of light levels (PAR) and temperature reproduced from Sunda and Huntsman, 2003. The solid circles represent the Kd (dark Kd, N=9) and the open circles represent the Khv (light Kd, N=10) shown in log scale. The solid lines are the linear least squares fit of the Kd recorded under each light condition at 10ºC and 20ºC.

**Figure S2.** *Crocosphaera* growth as a function of total iron concentration (scaled) and temperature. The experimental observations are shown as black open circles and the means of the experimental data are shown in black asterisks. The solid-colored lines represent the modeled fit following Monod growth kinetics, and the dashed colored lines indicate the upper and lower uncertainties in the data.

A

B

**Figure S3.** Temperature response of maximum growth rates **(A)** and Ksp **(B)**. Experimental observations are shown as dark blue open circles and the means of the experimental data are shown in dark blue asterisks. The solid blue line represents the modeled fit and the dashed blue lines indicate the upper and lower uncertainty in the data.

**Figure S4.** Two-way least squares fit of aggregated *Crocosphaera* growth versus N2-fixation responses, at all tested iron concentrations and temperatures across 4 time points during steady state growth. Experimental treatments were growth in triplicate for a total N=72.

A

B

C

**Figure S5.** Linear response of N-IUEs to temperature and iron concentration **(A)**. The slope (*m*) and intercept (*b*) were then related to temperature **(B** and **C**, respectively**)**. Experimental observations are shown as open circles and the means of the experimental data are shown in asterisks. The solid lines represent the modeled fit and the dashed lines indicate the upper and lower uncertainty in the data. For **(A)**, different colors represent the three temperature treatments (22°C, 27°C, and 32°C). The maximum *m* value as a function of temperature was set to 13.4616 (**B**) while the minimum *b* value was set to 5.1718 (**C**).

**Figure S6.** Cell diameter measurements of *Crocosphaera* for Fe-replete and Fe-limited conditions across three experimental growth temperatures, 22°C, 27°C, 32°C. Different letters of the boxplot represent statistical significance between mean values at *p-*value < 0.05. The number of measurements (n), mean, median, and interquartile (iqr) range of the cell diameter measurements are shown in the table.

%

AX

B

%

C

%

**Figure S7.** Sensitivity analysis of the modeled response of *Crocosphaera* N-IUE. Percent change ofN-IUE for the years 2010 and 2100 under the IPCC RCP8.5 warming scenario of the best fit model **(A)**, low sensitivity model **(B)**, and high sensitivity model **(C)**. Dark grey masked areas exclude areas where nitrate concentrations are > 5 µM or where temperatures are outside the thermal range, and where modeled growth rates are consequently assumed to be negligible (<0.01 d-1).

C

%

AX

B

%

%

**Figure S8.** Sensitivity analysis of the modeled response of *Crocosphaera* N2-fixation. Percent change ofN2-fixation for the years 2010 and 2100 under the IPCC RCP8.5 warming scenario relative to 2010 of the best fit model **(A)**, low sensitivity model **(B)**, and high sensitivity model **(C)**. Dark grey masked areas exclude areas where nitrate concentrations are > 5 µM or where temperatures are outside the thermal range, and where modeled growth rates are consequently assumed to be negligible (<0.01 d-1).

A

B

C

D

**Figure S9.** N-IUEs **(A)**, C-IUEs **(B)**, N2-fixation rates **(C)**, and C-fixation rates **(D)** of the N2-fixing cyanobacterium *Trichodesmium* grown in triplicate under Replete and Limited iron conditions at 22°C, 27°C, 32°C, and 35°C. Error bars are standard deviations from the mean and different letters represent statistical significance between mean values at *p-*value < 0.05. Modified from Jiang et al., 2018, with permission.

%

AX

B

%

**Figure S10.** Percent difference in the modeled interactive vs. additive responses of *Crocosphaera* (**A**) and *Trichodesmium* (modified with permission from Jiang et al., 2018) **(B)**.Shown are percent differences inthe two types of modelsforN2-fixation rate responses to Fe and warming in 2100. Grey masked areas exclude areas where nitrate concentrations are > 5 µM or where temperatures are outside the thermal range, and where modeled growth rates are consequently assumed to be negligible (<0.01 d-1).

Both (> 75%)

*Crocosphaera* (> 75%)

*Trichodesmium* (> 75%)

< 75%

No Activity

Both (> 25%)

*Crocosphaera* (> 25%)

*Trichodesmium* (> 25%)

< 25%

No Activity

Both (> 50%)

*Crocosphaera* (> 50%)

*Trichodesmium* (> 50%)

< 50%

No Activity

Both (> 90%)

*Crocosphaera* (> 90%)

*Trichodesmium* (> 90%)

< 90%

No Activity

**A**

**B**

**C**

**D**

**Figure S11.** Comparative change in modeled responses of *Crocosphaera* and *Trichodesmium* N-IUE in 2100 under the IPCC RCP8.5 warming scenario relative to 2010. Colored areas mark where the percent change in physiology is predicted to increase above assigned thresholds: top 25% (75% quantile) **(A)**, bottom 25% (25% quantile) **(B)**, top 50% (50% quantile) **(C)**, and top 90% (90% quantile) **(D)** for either diazotroph. *Crocosphaera* is highlighted in green and *Trichodesmium* in purple with the overlap between the two diazotrophs colored in orange. Light grey masked areas mark areas where activity is below the assigned quantiles for either diazotroph. Dark grey masks regions of assumed no activity where nitrate concentrations are > 5 µM or where temperatures are outside the thermal range, and where modeled growth rates are consequently assumed to be negligible (<0.01 d-1).

Both (> 75%)

*Crocosphaera* (> 75%)

*Trichodesmium* (> 75%)

< 75%

No Activity

Both (> 25%)

*Crocosphaera* (> 25%)

*Trichodesmium* (> 25%)

< 25%

No Activity

Both (> 50%)

*Crocosphaera* (> 50%)

*Trichodesmium* (> 50%)

< 50%

No Activity

Both (> 90%)

*Crocosphaera* (> 90%)

*Trichodesmium* (> 90%)

< 90%

No Activity

**A**

**B**

**C**

**D**

**Figure S12.** Comparative change in modelled responses of *Crocosphaera* and *Trichodesmium* N2-fixation in 2100 under the IPCC RCP8.5 warming scenario relative to 2010. Colored areas mark where the percent change in physiology is predicted to increase above assigned thresholds: top 25% (75% quantile) **(A)**, bottom 25% (25% quantile) **(B)**, top 50% (50% quantile) **(C)**, and top 90% (90% quantile) **(D)** for either diazotroph. *Crocosphaera* is highlighted in green and *Trichodesmium* in purple with the overlap between the two diazotrophs colored in orange. Light grey masked areas mark areas where activity is below the assigned quantiles for either diazotroph. Dark grey masks regions of assumed no activity where nitrate concentrations are > 5 µM or where temperatures are outside the thermal range, and where modeled growth rates are consequently assumed to be negligible (<0.01 d-1).

**Supplementary Tables:**

**Table S1:** Calculated average [Fe'] in Replete and Limited media for total Fe concentrations used: 250 nM for Fe-Replete and 5 nM for Fe-Limited cultures.

| Temperature  (°C) | [Fe']-Replete (pM) | [Fe']-Limited (pM) |
| --- | --- | --- |
| 22 | 1340 | 26.5 |
| 27 | 1120 | 22.2 |
| 32 | 966 | 19.1 |

**Table S2:** Mean intracellular Fe quotas (µmol Fe:mol C) ± the standard deviation for *Crocosphaera* across three temperature and two iron experimental conditions.The different letters represent the statistical significance between mean values at *p*-value < 0.05.

| Temperature | Fe-Replete | Fe-Limited |
| --- | --- | --- |
| 22°C | 78.8±15.4ab | 57.4±1.9abc |
| 27°C | 28±6.7bc | 14.5±1.9c |
| 32°C | 94.4±71.5a | 33.1±5.7bc |

**Extended Discussion on scaling Fe quotas:**

While it would be ideal to base our modeling parameters on laboratory data that reflect *in situ* field measurements, it is currently logistically impossible to measure the intracellular Fe content of *Crocosphaera* cells while they are growing *in situ a*s part of a mixed natural plankton community, so these values do not exist in the literature. In fact, even studies in lab cultures are lacking, and it is difficult to make comparisons between the two lab studies that do exist, due to methodological differences including varying light:dark cycles and the use of different Fe and EDTA concentrations which can impact Fe availability and thus, intracellular Fe content. Furthermore, the two prior studies that have reported Fe quota (Fe:C) values only reported them for a small, non-extracellular polysaccharide (EPS) producing strain of *Crocosphaera* (WH8501). No values have been produced for the larger, EPS-producing strains including our strain (WH0005) and there are no values available that incorporate the impact of temperature on Fe quotas. While we still need to scale the culture-based Fe parameters to reflect *in situ* conditions in our models, we can use the published values as a benchmark to compare against our own data. All our values fall within the ranges reported by Tuit et al., 2004 and our Fe-replete and Fe-limited trends follow those of Fu et al., 2008 where Fe quotas at optimum growth temperatures are higher for Fe-replete cultures than Fe-limited cultures. Altogether, these results show that given the existing constraints, our data remain the best available and are thus appropriate for parameterizing our models.

**Supplementary References:**

Jabre, L., and Bertrand, E. M. (2020). Interactive effects of iron and temperature on the growth of *Fragilariopsis cylindrus*. *Limnology and Oceanography Letters*. doi:10.1002/lol2.10158.

Fu, F.-X., Mulholland, M. R., Garcia, N. S., Beck, A., Bernhardt, P. W., Warner, M. E., et al. (2008). Interactions between changing pCO2, N2 fixation, and Fe limitation in the marine unicellular cyanobacterium *Crocosphaera*. *Limnol. Oceanogr.* 53, 2472–2484. doi:10.4319/lo.2008.53.6.2472.

Jiang, H.-B., Fu, F.-X., Rivero-Calle, S., Levine, N. M., Sañudo-Wilhelmy, S. A., Qu, P.-P., et al. (2018). Ocean warming alleviates iron limitation of marine nitrogen fixation. *Nat. Clim. Chang.* 8, 709–712. doi:10.1038/s41558-018-0216-8.

Sunda, W. G., and Huntsman, S. A. (1995). Iron uptake and growth limitation in oceanic and coastal phytoplankton. *Mar. Chem.* 50, 189–206. doi:10.1016/0304-4203(95)00035-P.

Sunda, W., and Huntsman, S. (2003). Effect of pH, light, and temperature on Fe–EDTA chelation and Fe hydrolysis in seawater. *Mar. Chem.* 84, 35–47. doi:10.1016/S0304-4203(03)00101-4.

Tuit, C., Waterbury, J., and Ravizza, G. (2004). Diel variation of molybdenum and iron in marine diazotrophic cyanobacteria. *Limnol. Oceanogr.* 49, 978–990. doi:10.4319/lo.2004.49.4.0978.
